# Supplementary material
Source: publisher figshare collection journal article supplement (https://acs.figshare.com/ndownloader/files/11869349)
Supplement: Supplementary file 1 [file 11869349]

## Supporting Information

# Facile preparation of Double Rare Earth-Doped Carbon Dots for MRI/CT/FI Multimodal Imaging

Yanzhi Zhao<sup>a,c</sup>, Xiaoting Hao<sup>b</sup>, Wei Lu<sup>b,c</sup>, Ruoming Wang<sup>b</sup>, Xueru Shan<sup>b</sup>, Qian Chen<sup>b</sup>,  
Guoying Sun<sup>b,c,\*</sup> and Jianhua Liu<sup>d,\*</sup>

<sup>a</sup> School of Chemical Engineering, Changchun University of Technology, 2055 Yanan Street, Changchun 130012, P. R. China.

<sup>b</sup> Jilin Province Key Laboratory of Carbon Fiber Development and Application, School of Chemistry and Life Science, Changchun University of Technology, 2055 Yanan Street, Changchun 130012, P. R. China \*E-mail: sunguoying@ccut.edu.cn

<sup>c</sup> Advanced Institute of Materials Science, Changchun University of Technology, 2055 Yanan Street, Changchun 130012, P. R. China

<sup>d</sup> Department of Radiology, Second Hospital of Jilin University, Changchun, 130041, P. R. China \*E-mail: drliujh@yahoo.com

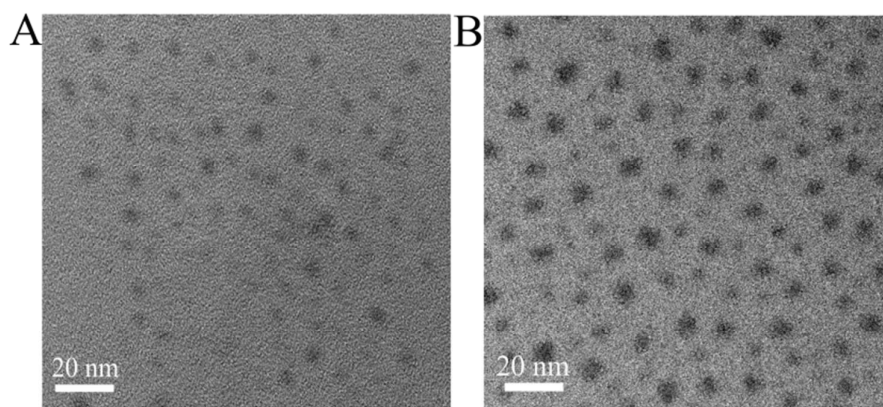

**Figure S1.** TEM images of (A) Gd/Yb@CDs and (B) CDs.

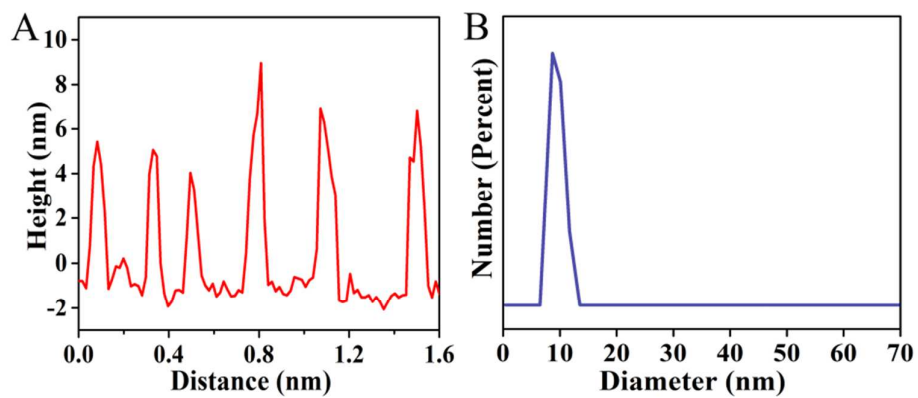

**Figure S2.** (A) The height profile along the line marked in the AFM image, (B) Hydrodynamic size of Gd/Yb@CDs.

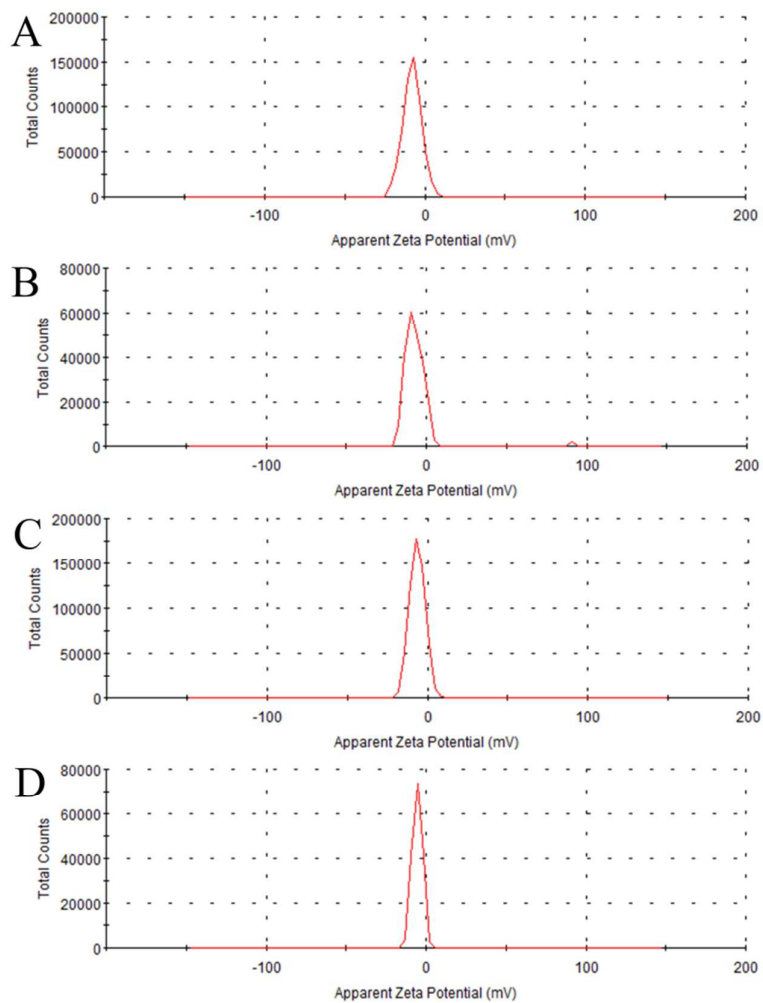

**Figure S3.** Zeta potential of (A) CDs, (B) Gd@CDs, (C) Yb@CDs and (D) Gd/Yb@CDs in water.

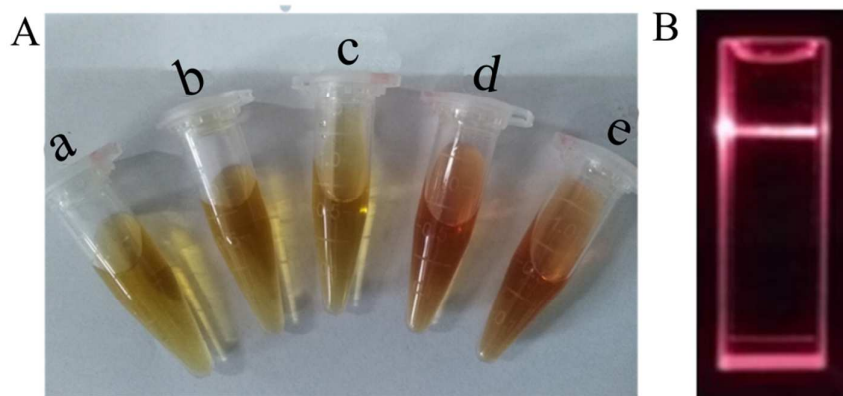

**Figure S4.** (A) The stability of Gd/Yb@CDs in water for 30 days (a), PBS for 0 day (b) and 30 days (c) and DMEM cell medium for 0 day (d) and 30 days (e), (B) The Tyndall effect exhibited by Gd/Yb@CDs in aqueous solution.

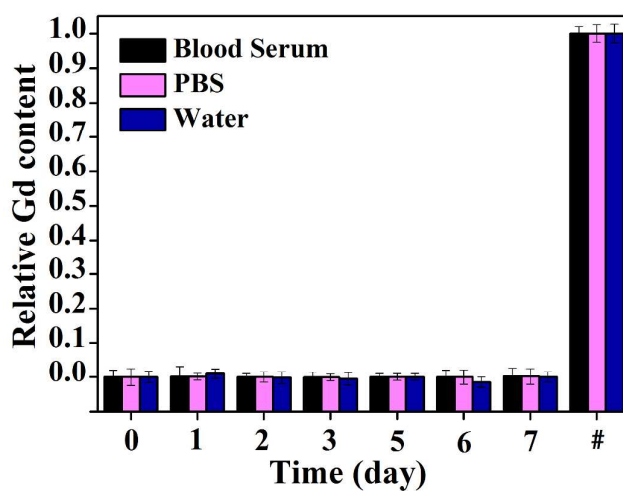

**Figure S5.** The  $Gd^{3+}$  leakage test of Gd/Yb@CDs in blood serum, PBS and water. # represents the overall Gd content in Gd/Yb@CDs.

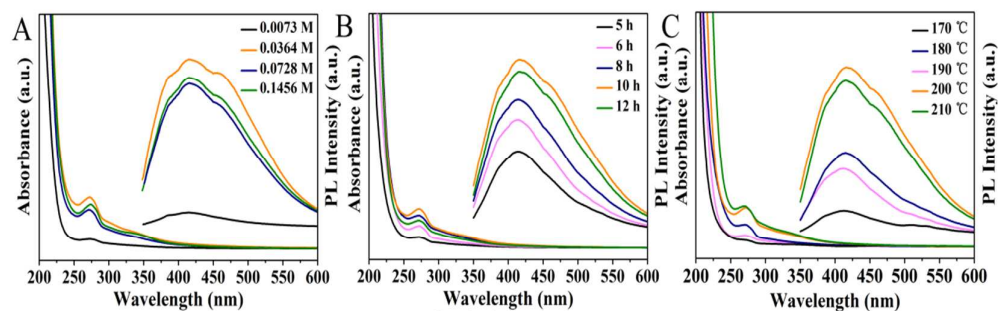

**Figure S6.** The UV-Vis absorption and fluorescence spectra ( $\lambda_{\text{ex}} = 340 \text{ nm}$ ) of Gd/Yb@CDs (A) with various L-arginine concentrations prepared (B) for 5 ~ 12 h (C) at 170 ~ 210 °C.

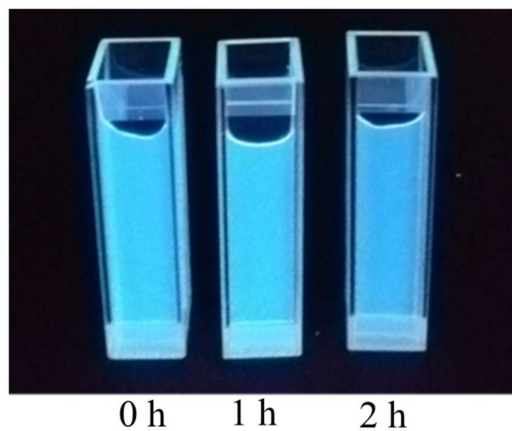

**Figure S7.** Photostability analysis of Gd/Yb@CDs under 365 nm UV light.

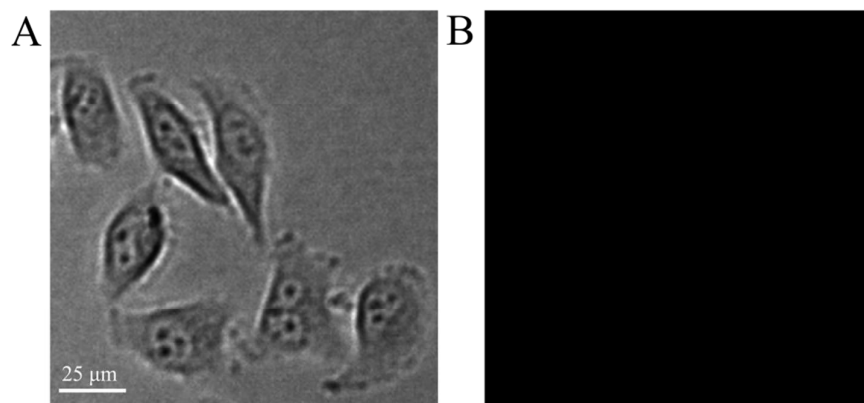

**Figure S8.** Cell images without the treatment of Gd/Yb@CDs: (A) bright-field micrograph, (B) fluorescence microscope images of HeLa cells.

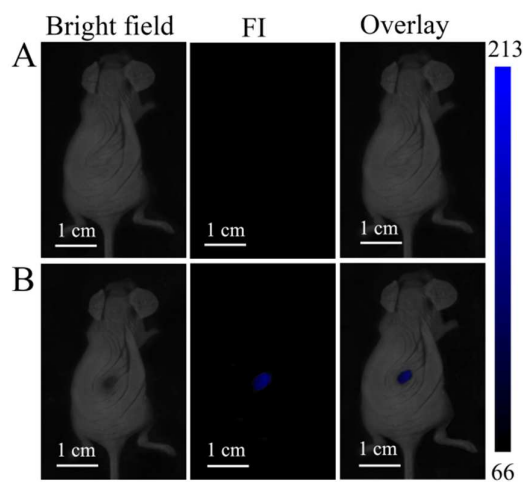

**Figure S9.** The *in vivo* fluorescence imaging of mice ( $\lambda_{\text{ex}} = 385 \text{ nm}$ ; irradiation time, 60 s) after subcutaneous injection (A) without and (B) with Gd/Yb@CDs.

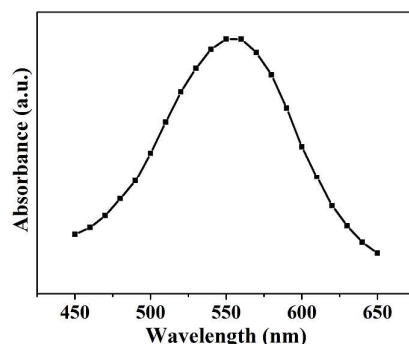

**Figure S10.** The UV-Vis absorption of the DMSO solution of purple formazan dye.

Since the maximum absorption of the DMSO solution of purple formazan dye was around 570 nm<sup>1,2</sup>, we chose 570 nm as the absorption wavelength instead of 490 nm, which could increase the detection sensitivity. Additionally, many articles also chose this wavelength in MTT experiments.

## REFERENCES

1. Jiang, C. H.; Wang, Y.; Wang, J. W.; Song, W.; Lu, L. H. Achieving Ultrasensitive *in vivo* Detection of Bone Crack with Polydopamine-capsulated Surface-enhanced Raman Nanoparticle. *Biomaterials* **2017**, *114*, 54-61.
2. Li Y. Y.; Jiang, C. H.; Zhang, D. W.; Wang, Y.; Ren, X. Y.; Ai, K. L.; Chen, X. S.; Lu, L. H. Targeted Polydopamine Nanoparticles Enable Photoacoustic Imaging Guided Chemo-photothermal Synergistic Therapy of Tumor. *Acta Biomaterialia* **2017**, *47*, 124-134.
